# Supplementary material
Source: PubMed Central journal article supplement (PMC7089832)
Supplement: NIHMS1558547-supplement-2.pdf [file NIHMS1558547-supplement-2.pdf]

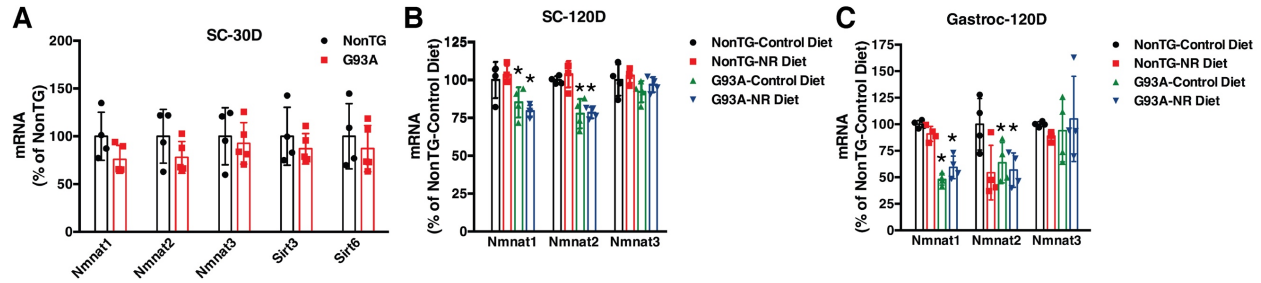

**Supplemental Figure 1. A)** Total RNA was isolated from the lumbar spinal cord of asymptomatic (30 days-old) hSOD1<sup>G93A</sup> (G93A) and non-transgenic (NonTG) mice. *Nmnat1*, *Nmnat2*, *Nmnat3*, *Sirt3* and *Sirt6* mRNA levels were determined by real-time PCR and corrected by *Rplp0* mRNA levels (n=4-5 mice per group). **B)** Total RNA was extracted from the lumbar spinal cord of early symptomatic (120 days-old) G93A mice and NonTG littermates on control or NR-supplemented diet. *Nmnat1*, *Nmnat2*, *Nmnat3* mRNA levels were determined by real-time PCR and corrected by *Rplp0* mRNA levels (n=4 mice per group, \*p<0.05, 2-way ANOVA). **C)** Total RNA was extracted from the gastrocnemius of early symptomatic (120 days-old) G93A mice and NonTG littermates on control or NR-supplemented diet. *Nmnat1*, *Nmnat2*, *Nmnat3* mRNA levels were determined by real-time PCR and corrected by *Rplp0* mRNA levels (n=4 mice per group, \*p<0.05, 2-way ANOVA). For all panels data are expressed as percentage of NonTG-control mice (mean ± SD).
