# Supplementary material
Source: PubMed Central journal article supplement (PMC7089832)
Supplement: NIHMS1558547-supplement-3.pdf [file NIHMS1558547-supplement-3.pdf]

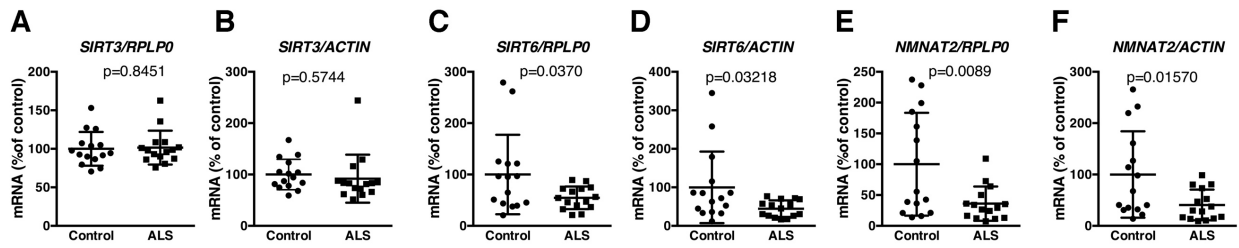

**Supplemental Figure 2.** Total RNA was extracted from spinal cord tissue of non-ALS controls (control) and ALS patients. mRNA levels for *SIRT3* (A,B) *SIRT6* (C,D) and *NMNAT2* (E,F) were determined by real-time PCR and corrected by *RPLP0* (A,C,E) or *ACTIN* (B,D,F) mRNA levels. For all panels, data are expressed as percentage of controls (mean  $\pm$  SD, n=15 in each group).
